# Supplementary material for: Meta-analysis of genome-wide association studies for litter size in sheep
Source: Research Square preprint supplement (doi:10.21203/rs.3.rs-770225/v1), 2021-08-02
Supplement: Supplementary file 1 [file 6eca74f9c34408d96a9ed497.xlsx]

## Sheet: KEGG Enrichment
ID	Description	GeneRatio	BgRatio	pvalue	p.adjust	qvalue	geneID	Count
oas04720	Long-term potentiation	9/145	68/9058	1.1883e-06	0.000170109	0.000137095	PLCB4/GRIA2/PPP3CC/CACNA1C/RPS6KA3/GRIN2A/GNAQ/PLCB1/PPP3CA	9
oas04724	Glutamatergic synapse	11/145	110/9058	1.32898e-06	0.000170109	0.000137095	PLCB4/GRIA2/GRM3/PPP3CC/GRM8/PLA2G4A/CACNA1C/GRIN2A/GNAQ/PLCB1/PPP3CA	11
oas04922	Glucagon signaling pathway	10/145	105/9058	6.38187e-06	0.00049919	0.000402308	PLCB4/PPP3CC/ACACA/GNAQ/CREB5/CPT1C/PRMT1/PFKM/PLCB1/PPP3CA	10
oas04020	Calcium signaling pathway	15/145	244/9058	7.79985e-06	0.00049919	0.000402308	PLCB4/FGF3/FLT1/PPP3CC/RYR3/CACNA1C/CHRM3/GRIN2A/TACR2/MCU/GNAQ/P2RX3/PTGER1/PLCB1/PPP3CA	15
oas04728	Dopaminergic synapse	10/145	130/9058	4.1932e-05	0.00214692	0.00173025	PLCB4/GRIA2/MAOB/PPP3CC/CACNA1C/GRIN2A/GNAQ/CREB5/PLCB1/PPP3CA	10
oas05017	Spinocerebellar ataxia	10/145	146/9058	0.00011205	0.0042716	0.00344257	SP1/PLCB4/GRIA2/ATXN1/RELN/GRIN2A/MCU/GNAQ/PSMD14/PLCB1	10
oas05031	Amphetamine addiction	7/145	70/9058	0.000120293	0.0042716	0.00344257	GRIA2/MAOB/PPP3CC/CACNA1C/GRIN2A/CREB5/PPP3CA	7
oas04713	Circadian entrainment	8/145	95/9058	0.000133487	0.0042716	0.00344257	RASD1/PLCB4/GRIA2/RYR3/CACNA1C/GRIN2A/GNAQ/PLCB1	8
oas04742	Taste transduction	7/145	82/9058	0.000325206	0.00848855	0.0068411	PLCB4/GABRA4/CACNA1C/CHRM3/P2RX3/SCN3A/PLCB1	7
oas04514	Cell adhesion molecules	10/145	168/9058	0.000352733	0.00848855	0.0068411	LOC101109746/LOC101116099/CNTNAP2/PTPRM/CDH4/NRXN1/NRCAM/SDC1/NEO1/NLGN4X	10
oas05022	Pathways of neurodegeneration - multiple diseases	19/145	499/9058	0.000364743	0.00848855	0.0068411	HTT/PLCB4/GRIA2/ATXN1/PPP3CC/NDUFB6/RYR3/CACNA1C/CHRM3/NOX1/RAB5A/GRIN2A/LOC101121518/MCU/GNAQ/PSMD14/DNAH5/PLCB1/PPP3CA	19
oas04927	Cortisol synthesis and secretion	6/145	68/9058	0.000734295	0.015665	0.0126247	SP1/PLCB4/CACNA1C/GNAQ/CREB5/PLCB1	6
oas04924	Renin secretion	6/145	71/9058	0.000923863	0.018193	0.0146621	PLCB4/PPP3CC/CACNA1C/GNAQ/PLCB1/PPP3CA	6
oas05030	Cocaine addiction	5/145	50/9058	0.0011645	0.0210394	0.0169561	GRIA2/GRM3/MAOB/GRIN2A/CREB5	5
oas04662	B cell receptor signaling pathway	6/145	75/9058	0.00123278	0.0210394	0.0169561	PPP3CC/VAV3/PIK3AP1/CARD11/SOS1/PPP3CA	6
oas04971	Gastric acid secretion	6/145	77/9058	0.00141415	0.0226264	0.0182351	PLCB4/KCNJ15/CHRM3/GNAQ/PLCB1/CFTR	6
oas04015	Rap1 signaling pathway	10/145	214/9058	0.0022574	0.0339938	0.0273963	PLCB4/FGF3/TEK/FLT1/VAV3/MAGI2/GRIN2A/GNAQ/MAGI1/PLCB1	10
oas04730	Long-term depression	5/145	59/9058	0.00245274	0.0348834	0.0281133	PLCB4/GRIA2/PLA2G4A/GNAQ/PLCB1	5
oas04911	Insulin secretion	6/145	87/9058	0.00264389	0.0349061	0.0281315	PLCB4/CACNA1C/CHRM3/GNAQ/CREB5/PLCB1	6
oas04072	Phospholipase D signaling pathway	8/145	151/9058	0.00288002	0.0349061	0.0281315	PLCB4/DNM3/GRM3/AGPAT2/GRM8/PLA2G4A/SOS1/PLCB1	8
oas04360	Axon guidance	9/145	186/9058	0.00295116	0.0349061	0.0281315	BMPR1B/UNC5C/SEMA5A/SMO/PPP3CC/SLIT2/NEO1/CXCL12/PPP3CA	9
oas04921	Oxytocin signaling pathway	8/145	152/9058	0.00299974	0.0349061	0.0281315	PLCB4/PPP3CC/RYR3/PLA2G4A/CACNA1C/GNAQ/PLCB1/PPP3CA	8
oas04152	AMPK signaling pathway	7/145	122/9058	0.00337363	0.036912	0.0297482	AKT1S1/ACACA/RPTOR/CREB5/CPT1C/PFKM/CFTR	7
oas04912	GnRH signaling pathway	6/145	93/9058	0.00369122	0.036912	0.0297482	PLCB4/PLA2G4A/CACNA1C/GNAQ/SOS1/PLCB1	6
oas04151	PI3K-Akt signaling pathway	14/145	389/9058	0.00373715	0.036912	0.0297482	FGF3/TEK/FLT1/COL6A6/MAGI2/PIK3AP1/RPTOR/RELN/CREB5/MAGI1/SOS1/PKN1/COL4A6/TNR	14
oas04929	GnRH secretion	5/145	65/9058	0.00374888	0.036912	0.0297482	PLCB4/ESR2/CACNA1C/GNAQ/PLCB1	5
oas05010	Alzheimer disease	14/145	393/9058	0.00409293	0.038807	0.0312754	PLCB4/PPP3CC/NDUFB6/RYR3/CACNA1C/CHRM3/NOX1/GRIN2A/LOC101121518/MCU/GNAQ/PSMD14/PLCB1/PPP3CA	14
oas04022	cGMP-PKG signaling pathway	8/145	168/9058	0.00549688	0.0502572	0.0405033	ADRA2C/PLCB4/PPP3CC/CACNA1C/GNAQ/CREB5/PLCB1/PPP3CA	8
oas04915	Estrogen signaling pathway	7/145	137/9058	0.00635748	0.0561212	0.0452292	SP1/PLCB4/ESR2/GNAQ/CREB5/SOS1/PLCB1	7
oas04660	T cell receptor signaling pathway	6/145	106/9058	0.00697879	0.0595524	0.0479945	DLG1/PPP3CC/VAV3/CARD11/SOS1/PPP3CA	6

## Sheet: GO Enrichment
source	term_name	term_id	adjusted_p_value	negative_log10_of_adjusted_p_value	term_size	query_size	intersection_size	effective_domain_size	intersections
GO:BP	regulation of cell communication	GO:0010646	1.65751e-05	4.78054	2038	236	66	14646	BMPR1B,TMEM108,MVB12B,AGO1,CDH13,HTT,FAM53B,FBN1,PLCB4,DAPK1,TFRC,DLG1,SLC7A11,SMO,TEK,KALRN,GAS2,FLT1,AKT1S1,ADAMTS12,SLC12A8,EIF4EBP2,WWC2,PRKAR2B,EGFL7,DLC1,UBASH3B,ANKRD17,MAGI2,CASK,UACA,PIK3AP1,RPTOR,NOX1,EFHB,RAB5A,RELN,GRIN2A,CARD11,MCU,POFUT1,PLAGL2,GNAQ,GPC5,P2RX3,NEO1,BCL2L12,RRAGB,CXCL12,RAB3GAP1,RGS1,MCC,GIPC1,PFKM,PLCB1,ARHGAP26,NRXN3,TNR,SRPX,CFTR,ULK4,PPP1R9A,MOB3B,TSPAN14,PPP3CA,…
GO:BP	regulation of signaling	GO:0023051	1.90201e-05	4.72079	2045	236	66	14646	BMPR1B,TMEM108,MVB12B,AGO1,CDH13,HTT,FAM53B,FBN1,PLCB4,DAPK1,TFRC,DLG1,SLC7A11,SMO,TEK,KALRN,GAS2,FLT1,AKT1S1,ADAMTS12,SLC12A8,EIF4EBP2,WWC2,PRKAR2B,EGFL7,DLC1,UBASH3B,ANKRD17,MAGI2,CASK,UACA,PIK3AP1,RPTOR,NOX1,EFHB,RAB5A,RELN,GRIN2A,CARD11,MCU,POFUT1,PLAGL2,GNAQ,GPC5,P2RX3,NEO1,BCL2L12,RRAGB,CXCL12,RAB3GAP1,RGS1,MCC,GIPC1,PFKM,PLCB1,ARHGAP26,NRXN3,TNR,SRPX,CFTR,ULK4,PPP1R9A,MOB3B,TSPAN14,PPP3CA,…
GO:BP	signaling	GO:0023052	0.00039279	3.40584	4465	236	109	14646	BMPR1B,UNC5C,TMEM108,SLC25A33,MVB12B,AGO1,PTPRD,CDH13,RERGL,ARHGAP31,DSCAM,HTT,FAM53B,FBN1,TENM1,RASD1,PLCB4,DOCK3,RGS12,GRIA2,GABRA4,DAPK1,TFRC,DLG1,SLC7A11,GRM3,SMO,TEK,KALRN,GAS2,EPS8,FLT1,CELSR3,DLGAP2,ASB8,AKT1S1,ADTRP,ADAMTS12,ESR2,SLC12A8,PDK4,PPP3CC,EIF4EBP2,WWC2,PRKAR2B,EGFL7,TOPORS,VAV3,DLC1,UBASH3B,ADGRB3,GRK4,PTPRM,ANKRD17,MAGI2,CASK,RASSF9,UACA,PIK3AP1,CHRM3,ACTN2,RPS6KA3,RPTOR,ATRNL…
GO:BP	cell communication	GO:0007154	0.000683807	3.16507	4510	236	109	14646	BMPR1B,UNC5C,TMEM108,SLC25A33,MVB12B,AGO1,PTPRD,CDH13,RERGL,ARHGAP31,DSCAM,HTT,FAM53B,FBN1,TENM1,RASD1,PLCB4,DOCK3,RGS12,GRIA2,GABRA4,DAPK1,TFRC,DLG1,SLC7A11,GRM3,SMO,TEK,KALRN,GAS2,EPS8,FLT1,CELSR3,DLGAP2,ASB8,AKT1S1,ADTRP,ADAMTS12,ESR2,SLC12A8,PDK4,PPP3CC,EIF4EBP2,WWC2,PRKAR2B,EGFL7,TOPORS,VAV3,DLC1,UBASH3B,ADGRB3,GRK4,PTPRM,ANKRD17,MAGI2,CASK,RASSF9,UACA,PIK3AP1,CHRM3,ACTN2,RPS6KA3,RPTOR,ATRNL…
GO:BP	modulation of chemical synaptic transmission	GO:0050804	0.00426962	2.36961	247	236	16	14646	TMEM108,PLCB4,SLC7A11,EIF4EBP2,PRKAR2B,CASK,RAB5A,RELN,GRIN2A,P2RX3,RAB3GAP1,GIPC1,NRXN3,TNR,PPP1R9A,PPP3CA
GO:BP	regulation of trans-synaptic signaling	GO:0099177	0.00426962	2.36961	247	236	16	14646	TMEM108,PLCB4,SLC7A11,EIF4EBP2,PRKAR2B,CASK,RAB5A,RELN,GRIN2A,P2RX3,RAB3GAP1,GIPC1,NRXN3,TNR,PPP1R9A,PPP3CA
GO:BP	signal transduction	GO:0007165	0.00899028	2.04623	4169	236	99	14646	BMPR1B,UNC5C,TMEM108,SLC25A33,MVB12B,AGO1,CDH13,RERGL,ARHGAP31,DSCAM,HTT,FAM53B,FBN1,TENM1,RASD1,PLCB4,DOCK3,RGS12,GRIA2,GABRA4,DAPK1,TFRC,DLG1,GRM3,SMO,TEK,KALRN,GAS2,EPS8,FLT1,CELSR3,ASB8,AKT1S1,ADTRP,ADAMTS12,ESR2,SLC12A8,PDK4,PPP3CC,EIF4EBP2,WWC2,EGFL7,TOPORS,VAV3,DLC1,UBASH3B,ADGRB3,GRK4,PTPRM,ANKRD17,MAGI2,RASSF9,UACA,PIK3AP1,CHRM3,ACTN2,RPS6KA3,RPTOR,ATRNL1,NOX1,EFHB,RAB5A,RELN,GRIN2A,TACR…
GO:BP	locomotion	GO:0040011	0.0144476	1.8402	1161	236	39	14646	BMPR1B,UNC5C,ETS1,CDH13,TMEM201,DSCAM,SP1,SMO,TEK,ZSWIM6,NEDD9,EPS8,FLT1,CELSR3,TTLL1,ADTRP,ADAMTS12,VAV3,LGI1,DLC1,PTPRM,NAV3,CDH4,NOX1,RELN,GRIN2A,TACR2,NRCAM,SYNE2,MCU,DNAH5,NEO1,CXCL12,MCC,PKN1,GIPC1,TNR,ULK4,PPP3CA
GO:BP	intracellular signal transduction	GO:0035556	0.0209732	1.67833	1591	236	48	14646	AGO1,CDH13,ARHGAP31,HTT,PLCB4,DOCK3,DAPK1,TFRC,DLG1,SMO,TEK,KALRN,EPS8,FLT1,ASB8,AKT1S1,ADTRP,SLC12A8,PPP3CC,EIF4EBP2,WWC2,TOPORS,VAV3,DLC1,ANKRD17,MAGI2,UACA,PIK3AP1,RPS6KA3,RPTOR,NOX1,EFHB,RELN,GRIN2A,CARD11,MCU,PLAGL2,BCL2L12,RRAGB,CXCL12,SOS1,PLCB1,PIK3C2G,ARHGAP26,ULK4,PPP1R9A,MOB3B,PPP3CA
GO:BP	movement of cell or subcellular component	GO:0006928	0.0279651	1.55338	1330	236	42	14646	BMPR1B,UNC5C,TMEM108,ETS1,CDH13,TMEM201,DSCAM,HTT,SP1,DLG1,SMO,TEK,ZSWIM6,NEDD9,EPS8,FLT1,CELSR3,TTLL1,ADTRP,ADAMTS12,VAV3,LGI1,DLC1,PTPRM,NAV3,CDH4,KIF6,NOX1,RELN,TACR2,NRCAM,SYNE2,MCU,DNAH5,NEO1,CXCL12,MCC,PKN1,GIPC1,TNR,ULK4,PPP3CA
GO:BP	cellular response to stimulus	GO:0051716	0.0342214	1.4657	5155	236	114	14646	BMPR1B,UNC5C,TMEM108,SLC25A33,MVB12B,AGO1,CDH13,RERGL,ARHGAP31,DSCAM,HTT,FAM53B,FBN1,TENM1,RASD1,PLCB4,DOCK3,RGS12,GRIA2,GABRA4,DAPK1,TFRC,DLG1,SLC7A11,APLF,GRM3,SMO,TEK,KALRN,GAS2,EPS8,FLT1,CELSR3,ASB8,AKT1S1,SOX5,ADTRP,ADAMTS12,ESR2,SLC12A8,PDK4,PYROXD1,PPP3CC,EIF4EBP2,WWC2,EGFL7,TOPORS,VAV3,DLC1,UBASH3B,ACACA,CRB1,ADGRB3,GRK4,PTPRM,ANKRD17,MAGI2,NUGGC,ABTB2,RASSF9,UACA,PIK3AP1,CHRM3,ACTN2,RPS6…
GO:BP	trans-synaptic signaling	GO:0099537	0.0398414	1.39967	362	236	18	14646	TMEM108,PTPRD,PLCB4,SLC7A11,DLGAP2,EIF4EBP2,PRKAR2B,CASK,RAB5A,RELN,GRIN2A,P2RX3,RAB3GAP1,GIPC1,NRXN3,TNR,PPP1R9A,PPP3CA
GO:CC	cell projection	GO:0042995	6.06854e-05	4.21692	1116	227	41	14407	UNC5C,TMEM108,PCDH15,SUN5,CDH13,ARHGAP31,DSCAM,HTT,PLCB4,DLG1,SLC7A11,GRM3,ACAP2,SMO,TEK,ZSWIM6,EPS8,TTLL1,GRIP1,PRKAR2B,TOPORS,DLC1,CRB1,PTPRM,MAGI2,AHCYL2,ACTN2,NOX1,RAB5A,RELN,GRIN2A,TACR2,SYNE2,MAGI1,DNAH5,P2RX3,CPT1C,GIPC1,PFKM,PPP1R9A,PPP3CA
GO:CC	plasma membrane bounded cell projection	GO:0120025	7.59869e-05	4.11926	1083	227	40	14407	UNC5C,TMEM108,PCDH15,SUN5,CDH13,ARHGAP31,DSCAM,HTT,PLCB4,DLG1,SLC7A11,GRM3,ACAP2,SMO,TEK,ZSWIM6,EPS8,TTLL1,GRIP1,PRKAR2B,TOPORS,DLC1,CRB1,PTPRM,MAGI2,AHCYL2,ACTN2,NOX1,RAB5A,RELN,GRIN2A,TACR2,SYNE2,DNAH5,P2RX3,CPT1C,GIPC1,PFKM,PPP1R9A,PPP3CA
GO:CC	glutamatergic synapse	GO:0098978	0.000214278	3.66902	206	227	15	14407	PTPRD,PLCB4,DLG1,GRM3,EPS8,GRIP1,PPP3CC,PRKAR2B,LGI1,GRIN2A,GRID1,CPT1C,GIPC1,TNR,PPP3CA
GO:CC	neuron projection	GO:0043005	0.000314615	3.50222	503	227	24	14407	UNC5C,TMEM108,PCDH15,CDH13,DSCAM,HTT,PLCB4,DLG1,GRM3,ZSWIM6,EPS8,GRIP1,PRKAR2B,TOPORS,MAGI2,AHCYL2,RAB5A,RELN,GRIN2A,P2RX3,CPT1C,GIPC1,PPP1R9A,PPP3CA
GO:CC	cell junction	GO:0030054	0.00106188	2.97392	1070	227	37	14407	TMEM108,PTPRD,HTT,PLCB4,DLG1,GRM3,TEK,EPS8,DLGAP2,NUFIP1,SLC12A8,GRIP1,PPP3CC,PRKAR2B,LGI1,DLC1,CRB1,PTPRM,MAGI2,CAPN5,CASK,ACTN2,RAB5A,GRIN2A,GRID1,SYNE2,MAGI1,P2RX3,CPT1C,GIPC1,NLGN4X,CLDN12,ARHGAP26,NRXN3,TNR,PPP1R9A,PPP3CA
GO:CC	cell periphery	GO:0071944	0.00108056	2.96635	3098	227	78	14407	BMPR1B,UNC5C,PCDH15,MVB12B,CDH13,DSCAM,TENM1,LOC101109746,LOC101116099,DAPK1,TFRC,DLG1,SLC7A11,GRM3,SMO,TEK,MDGA2,NEDD9,EPS8,FLT1,CELSR3,SLC4A11,NUBP1,ADTRP,SLC12A8,GRIP1,SLCO1A2,PRKAR2B,VAV3,DLC1,CRB1,ADGRB3,PTPRM,MAGI2,CACNA1C,CDH4,FAT3,OSBPL6,CCNT2,CASK,SLC51A,PIK3AP1,CHRM3,ACTN2,PLPPR5,NOX1,RAB5A,ANKH,SLC4A1AP,RIF1,GRIN2A,TACR2,CARD11,GRID1,NRXN1,NRCAM,SYNE2,MAGI1,ADAM7,GPC5,P2RX3,NEO1,CPT1C,…
GO:CC	plasma membrane	GO:0005886	0.00138558	2.85837	3010	227	76	14407	BMPR1B,UNC5C,PCDH15,MVB12B,CDH13,DSCAM,TENM1,LOC101109746,LOC101116099,DAPK1,TFRC,DLG1,SLC7A11,GRM3,SMO,TEK,MDGA2,NEDD9,EPS8,FLT1,CELSR3,SLC4A11,NUBP1,ADTRP,SLC12A8,GRIP1,SLCO1A2,PRKAR2B,VAV3,DLC1,CRB1,ADGRB3,PTPRM,MAGI2,CACNA1C,CDH4,FAT3,OSBPL6,CCNT2,CASK,SLC51A,PIK3AP1,CHRM3,ACTN2,PLPPR5,NOX1,RAB5A,ANKH,SLC4A1AP,RIF1,GRIN2A,TACR2,CARD11,GRID1,NRXN1,NRCAM,SYNE2,MAGI1,ADAM7,GPC5,P2RX3,NEO1,CPT1C,…
GO:CC	synapse	GO:0045202	0.00156185	2.80636	629	227	26	14407	TMEM108,PTPRD,HTT,PLCB4,DLG1,GRM3,EPS8,DLGAP2,NUFIP1,GRIP1,PPP3CC,PRKAR2B,LGI1,CAPN5,CASK,RAB5A,GRIN2A,GRID1,P2RX3,CPT1C,GIPC1,NLGN4X,NRXN3,TNR,PPP1R9A,PPP3CA
GO:CC	dendritic tree	GO:0097447	0.0116412	1.934	191	227	12	14407	UNC5C,DSCAM,HTT,PLCB4,GRM3,PRKAR2B,MAGI2,RELN,CPT1C,GIPC1,PPP1R9A,PPP3CA
GO:CC	dendrite	GO:0030425	0.0116412	1.934	191	227	12	14407	UNC5C,DSCAM,HTT,PLCB4,GRM3,PRKAR2B,MAGI2,RELN,CPT1C,GIPC1,PPP1R9A,PPP3CA
GO:CC	somatodendritic compartment	GO:0036477	0.0414293	1.38269	286	227	14	14407	UNC5C,TMEM108,DSCAM,HTT,PLCB4,GRM3,PRKAR2B,MAGI2,RAB5A,RELN,CPT1C,GIPC1,PPP1R9A,PPP3CA

## Sheet: Enrichment by Protein databases
# background genes	# genes	category	chart color	description	FDR value	genes	network.SUID	nodes.SUID	p-value	PMID	term name	transferred FDR value	year
38	7	Pfam		Laminin G domain	0.0025	NRXN3|FAT3|NRXN1|SLIT2|CRB1|CELSR3|CNTNAP2	126	446|409|408|374|239|190|147	5.07e-06		PF00054	0.685496	0
43	7	Pfam		Laminin G domain	0.0026	NRXN3|FAT3|NRXN1|SLIT2|CRB1|CELSR3|CNTNAP2	126	446|409|408|374|239|190|147	1.04e-05		PF02210	0.681009	0
47	7	SMART Domains		Laminin G domain	0.0033	NRXN3|FAT3|NRXN1|SLIT2|CRB1|CELSR3|CNTNAP2	126	446|409|408|374|239|190|147	1.76e-05		SM00282	0.653731	0
204	13	SMART Domains		Epidermal growth factor-like domain.	0.0033	RELN|NRXN3|FAT3|NRXN1|SLIT2|TNR|TENM1|CRB1|ATRNL1|CELSR3|CNTNAP2|HEG1|FBN1	126	369|446|409|408|374|279|339|239|323|190|147|343|232	3.19e-05		SM00181	0.653731	0
203	13	UniProt Keywords		EGF-like domain	0.0043	RELN|NRXN3|FAT3|NRXN1|SLIT2|TENM1|TEK|CRB1|ATRNL1|CELSR3|CNTNAP2|HEG1|FBN1	126	369|446|409|408|374|339|447|239|323|190|147|343|232	3.04e-05		KW-0245	0.623447	0
882	32	InterPro Domains		P-loop containing nucleoside triphosphate hydrolase	0.0116	RASD1|CASK|KATNAL2|CARD11|GFM2|CLPB|RRAGB|NUBP1|FIGN|ABCA1|ARL5A|DAPK1|CHST15|SULT1E1|MAGI1|LACE1|GNAQ|NMRK1|DDX10|DNAH5|RAB44|DNM3|NUGGC|NAV3|RAB5A|KIF6|CMSS1|NDST4|CFTR|RASD2|DLG1|RERGL	126	431|384|287|435|218|181|459|306|368|290|299|136|367|426|169|152|192|441|256|238|317|275|357|177|383|373|425|146|407|392|436|187	1.24e-05		IPR027417	0.509906	0
218	14	InterPro Domains		EGF-like domain	0.0116	RELN|NRXN3|FAT3|NRXN1|SLIT2|TNR|TENM1|TEK|CRB1|ATRNL1|CELSR3|CNTNAP2|HEG1|FBN1	126	369|446|409|408|374|279|339|447|239|323|190|147|343|232	1.47e-05		IPR000742	0.509906	0
139	9	SMART Domains		Domain present in PSD-95, Dlg, and ZO-1/2.	0.0238	GRIP1|PPP1R9A|CASK|CARD11|GIPC1|ERBB2IP|MAGI1|MAGI2|DLG1	126	304|242|384|435|434|332|169|382|436	0.00047		SM00228	0.42768	0
80	7	SMART Domains		EGF domain, unclasssified subfamily	0.0238	RELN|FAT3|TNR|TENM1|TEK|ATRNL1|HEG1	126	369|409|279|339|447|323|343	0.00038		SM00001	0.42768	0
84	8	InterPro Domains		CH domain superfamily	0.024	ACTN2|DNMT3B|GAS2|NAV3|MAPRE1|CAMSAP2|VAV3|SYNE2	126	285|365|437|177|167|168|389|324	8.4e-05		IPR036872	0.426723	0
134	10	InterPro Domains		Immunoglobulin I-set	0.024	NRCAM|DSCAM|FLT1|PTPRD|OPCML|UNC5C|NEO1|LSAMP|KALRN|MDGA2	126	249|355|262|336|301|179|364|458|209|347	7.69e-05		IPR013098	0.426723	0
62	7	InterPro Domains		Laminin G domain	0.024	NRXN3|FAT3|NRXN1|SLIT2|CRB1|CELSR3|CNTNAP2	126	446|409|408|374|239|190|147	8.8e-05		IPR001791	0.426723	0
181	10	SMART Domains		Immunoglobulin C-2 Type	0.0283	NRCAM|DSCAM|FLT1|PTPRD|OPCML|UNC5C|NEO1|LSAMP|KALRN|MDGA2	126	249|355|262|336|301|179|364|458|209|347	0.00075		SM00408	0.407867	0
183	11	InterPro Domains		EGF-like, conserved site	0.0326	RELN|FAT3|SLIT2|TNR|TENM1|TEK|CRB1|ATRNL1|CELSR3|HEG1|FBN1	126	369|409|374|279|339|447|239|323|190|343|232	0.00021		IPR013032	0.391683	0
74	7	Pfam		EGF-like domain	0.04	NRXN3|NRXN1|SLIT2|CRB1|CELSR3|HEG1|FBN1	126	446|408|374|239|190|343|232	0.00024		PF00008	0.368278	0
4237	91	UniProt Keywords		Coiled coil	0.0401	GRID1|PHACTR2|MED9|ARHGAP26|PPP1R9A|CASK|KIAA1217|ULK4|C20orf194|ACTN2|CARD11|AHCYL2|FAM169A|GFM2|JMJD1C|DNMT3B|HERPUD2|CLPB|SUN5|SCN3A|BPIFB6|U2SURP|KCNH7|DIAPH3|SNX6|ZSWIM6|WWC2|MCU|BAZ2B|PLEKHA6|C1orf168|DOCK3|CENPP|NOL8|MTMR2|RIF1|SSRP1|CREB5|PLCB1|BAG1|PLCB4|CRCP|MAGI1|FAM135A|GLTSCR1|NCKAP5|PAN3|BANP|ZNF469|DDX10|CACNA1C|BCL2L12|SACS|SFMBT2|DNAH5|ANKRD17|RAB44|TNR|GIT2|TCHP|KCNJ15|COL6A6|NE…	126	228|161|340|251|242|384|182|305|390|285|435|149|260|218|286|365|185|181|452|264|457|230|414|203|377|224|394|268|270|391|439|351|201|430|250|153|189|342|315|150|276|359|169|387|173|316|155|313|429|256|259|311|156|300|238|427|317|279|171|196|298|271|272|357|177|172|381|167|282|405|174|168|373|139|227|388|432|341|392|362|180|175|292|338|448|148|209|436|142|144|324	0.00057		KW-0175	0.367993	0
79	7	InterPro Domains		Calponin homology domain	0.047	ACTN2|GAS2|NAV3|MAPRE1|CAMSAP2|VAV3|SYNE2	126	285|437|177|167|168|389|324	0.00035		IPR001715	0.349827	0

## Sheet: Functional Clustring
Term	Count	%	PValue	Genes	List Total	Pop Hits	Pop Total	Fold Enrichment	Bonferroni	Benjamini	FDR
SM00282:LamG	6	1.41844	0.000832621	CRB1, NRXN1, NRXN3, FAT3, SLIT2, CELSR3	171	36	8147	7.94055	0.134202	0.0934779	0.0934779
SM00181:EGF	11	2.60047	0.00108067	CRB1, TENM1, RELN, ATRNL1, NRXN3, TNR, FAT3, SLIT2, TEK, CELSR3, FBN1	171	149	8147	3.51729	0.170603	0.0934779	0.0934779
IPR001791:Laminin G domain	6	1.41844	0.00148617	CRB1, NRXN1, NRXN3, FAT3, SLIT2, CELSR3	280	47	15550	7.08967	0.617973	0.240387	0.240016
IPR013032:EGF-like, conserved site	10	2.36407	0.00241765	CRB1, TENM1, RELN, ATRNL1, TNR, FAT3, SLIT2, TEK, CELSR3, FBN1	280	160	15550	3.47098	0.791145	0.279014	0.278583
IPR000742:Epidermal growth factor-like domain	11	2.60047	0.00258746	CRB1, TENM1, RELN, ATRNL1, NRXN3, TNR, FAT3, SLIT2, TEK, CELSR3, FBN1	280	193	15550	3.16525	0.812927	0.279014	0.278583
IPR013320:Concanavalin A-like lectin/glucanase, subgroup	9	2.12766	0.0192276	CRB1, NRXN1, NRXN3, PTPRM, FAT3, SLIT2, MDGA2, CELSR3, RYR3	280	186	15550	2.68721	0.999996	1	1
EGF-like domain	6	1.41844	0.045504	CRB1, TENM1, ATRNL1, FAT3, SLIT2, FBN1	291	111	16570	3.07792	0.998225	0.540285	0.536312
IPR000152:EGF-type aspartate/asparagine hydroxylation site	5	1.18203	0.066586	CRB1, NRXN3, FAT3, SLIT2, FBN1	280	85	15550	3.26681	1	1	1
IPR001881:EGF-like calcium-binding	5	1.18203	0.114166	CRB1, FAT3, SLIT2, CELSR3, FBN1	280	103	15550	2.69591	1	1	1
SM00179:EGF_CA	5	1.18203	0.167938	CRB1, FAT3, SLIT2, CELSR3, FBN1	171	103	8147	2.31278	1	1	1
IPR018097:EGF-like calcium-binding, conserved site	4	0.945626	0.173475	CRB1, FAT3, SLIT2, FBN1	280	80	15550	2.77679	1	1	1
Disulfide bond	21	4.96454	0.317689	SEMA5A, CRB1, SRPX, TENM1, FLT1, ATRNL1, HEXB, GABRA4, NRXN3, CPZ, CELSR3, SMO, COL4A6, LOC101109746, FAT3, ADAM7, SLIT2, TEK, CSMD2, CD55, FBN1	291	1012	16570	1.18159	1	1	1
Enrichment Score: 1.774020245787677

## Sheet: Gene Vector
Significant genes in gene vector
LOC105608122
LOC106991233
BMPR1B
UNC5C
LOC105615443
LOC105607546
TMEM108
LOC106990887
LOC105614803
MTX2
LOC105602706
PCDH15
KLF15
SLC25A33
MVB12B
AGO1
ETS1
PTPRD
DIAPH3
B3GALT1
ADRA2C
SUN5
BPIFB2
LOC106990898
NMRK1
SNX6
LOC101103761
MBNL1
LOC101120408
EPB41L4A
RNF180
CDH13
NCKAP5
MAN2A1
TMEM201
RERGL
ARHGAP31
HEXB
GFM2
DSCAM
DDX10
LOC105602408
DNMT3B
MAPRE1
HTT
STYXL1
MDH2
FAM53B
EFCAB8
TCHP
GIT2
FBN1
LOC105611302
TENM1
LOC101109746
LOC101116099
LOC105602673
CELF2
SP1
MED9
LOC105608394
RASD1
PLCB4
DOCK3
PEMT
FGF3
LOC105604135
U2SURP
LOC105602668
LOC105606100
RGS12
GRIA2
GABRA4
DNM3
CPZ
PLEKHA6
LOC101114456
SGMS1
DAPK1
LOC106990872
TFRC
LOC105603854
SFMBT2
DENND5A
ATXN1
BANP
DLG1
SEMA5A
SLC7A11
APLF
TRNAC-ACA_31
GLTSCR1
GRM3
ACAP2
SMO
DMD
LOC105608429
LOC105611471
TEK
LOC101105985
KCNH7
LOC105610826
CCSER1
LOC105604776
KALRN
ZSWIM6
ZNF385D
MDGA2
FLVCR1
LACE1
FAM13A
LOC101118764
LOC101118510
LOC101102706
LOC106990964
LOC106991509
ST6GALNAC3
NOL8
CENPP
LOC101121251
CD55
CARNMT1
LOC101118736
GAS2
SVIP
LOC105615111
LOC106990850
NEDD9
EPS8
FLT1
PAN3
MAOB
LOC105605296
CELSR3
NPAS3
MRPL50
LOC101106149
USP6NL
LOC105616650
DLGAP2
SULT1E1
LOC101108134
GPATCH2
LOC101122345
ASB8
LOC105611714
TRNAE-CUC_8
CNTNAP2
TBC1D17
AKT1S1
LOC101114462
LOC105602079
SOX5
GPALPP1
NUFIP1
TMEM221
NXNL1
TTLL1
C13H20orf194
SLC4A11
NUBP1
TVP23A
LOC106990906
ADTRP
ADAMTS12
COL6A6
ESR2
LOC105608649
SLC12A8
GRIP1
TRA2A
PDK4
SLCO1A2
PYROXD1
SLC39A14
PPP3CC
EIF4EBP2
LOC105609347
WWC2
PRKAR2B
ZNF532
EGFL7
AGPAT2
LOC105607218
C1H1orf168
LOC101107502
NDUFB6
TOPORS
VAV3
PACRG
LOC106990969
METTL21A
LGI1
LOC105609042
DLC1
RYR3
GRM8
LOC101108519
UBASH3B
SLC38A10
C11H17orf89
ENTHD2
LOC105609560
SACS
ACACA
CRB1
LOC105613155
LOC105615971
ADGRB3
GRK4
LOC105616444
LSAMP
COBLL1
PTPRM
ERBB2IP
PLA2G4A
FOXE3
ANKRD17
WBSCR17
MAGI2
SFMBT1
BAG1
SPINK4
NAV3
CACNA1C
ADK
NUGGC
ZNF469
CDH4
FAM135A
LOC105609123
FAM169A
KIF6
FBXL17
CLPB
LOC101102992
LOC101110326
AHCYL2
ABRACL
FAT3
LOC105615239
BCO1
LOC105611453
BPIFB6
CAPN5
OSBPL6
BAZ2B
LOC101106609
CCNT2
ACMSD
LOC101105122
KCNJ15
CASK
TRNAG-UCC_52
SLC51A
ABTB2
RASSF9
JMJD1C
LOC101115153
LOC101118954
UACA
PIK3AP1
CHRM3
ACTN2
LARGE
EIF1AX
RPS6KA3
RPTOR
ATRNL1
PLPPR5
LOC105613042
LOC101115219
NOX1
LOC105601901
LOC101117144
LOC105604412
EFHB
RAB5A
ANKH
SLC4A1AP
LOC106991042
RELN
CHST15
LOC105602720
YPEL2
ZNF165
LOC105603485
PTPRG
RIF1
MMD2
GRIN2A
LOC101121518
LOC105608665
LOC101122517
ECD
LOC105605078
NUDT13
DBNDD2
PTPRT
TRNAE-CUC_5
TACR2
LOC105604969
CARD11
GRID1
NRXN1
LOC101114134
NRCAM
SFXN5
STS
FILIP1L
CMSS1
PHACTR2
ATP10A
SDC1
GADL1
SLC25A36
C3H2orf16
SYNE2
MCU
TM9SF4
POFUT1
PLAGL2
AMHR2
NDUFAF2
ERCC8
TOX
KIAA1217
LOC105616675
LOC105616676
RASD2
GNAQ
RGCC
CREB5
FIGN
AMD1
CDK19
MTMR2
MAGI1
LOC105609312
ADAM7
CSTF2
TRNAE-UUC_22
PSMD14
SLIT2
DNAH5
BCL9
GPC5
LOC105606601
ECHDC1
SMYD3
P2RX3
SSRP1
PPA2
NEO1
RBP1
LOC105604200
CSMD2
LOC105611810
ADM5
BCL2L12
CPT1C
PRMT1
RRAGB
LOC101111286
OPCML
CXCL12
MID1IP1
RAB3GAP1
CAMSAP2
DMRT2
MSRA
RGS1
SCN3A
LOC105603073
LOC106991058
SOS1
MCC
PKN1
GIPC1
PTGER1
LOC101119233
LOC101118971
ABCA1
NLGN4X
PFKM
RAB44
ZNF438
LOC101104739
LOC101104986
POLN
HAUS3
PLCB1
CRCP
CLDN12
SUN3
COL4A6
PIK3C2G
MRGPRF
LOC101115243
SGCZ
ARHGAP26
HERPUD2
HPSE2
NRXN3
TNR
LOC105612216
SRPX
LOC105605665
CHID1
TSPAN4
KATNAL2
LOC105609375
CFTR
MACROD2
LOC105608701
C24H16orf72
NDST4
ARL5A
LOC105609580
ULK4
LOC105608543
LOC101118951
PPP1R9A
MOB3B
TRNAG-CCC_93
TMEM187
HCFC1
LOC105605542
TSPAN14
PPP3CA
ASXL2
